# Supplementary material
Source: PubMed Central journal article supplement (PMC2682912)
Supplement: M807631200_1.pdf [file M807631200_1.pdf]

---

**Supplementary Table 1. RMSD values (Å) from superposition of C- $\alpha$  atoms**

---

|           | PFO (I) | PFO (III) | ILY   |
|-----------|---------|-----------|-------|
| ALO D1    | 1.841   | 1.803     | 1.479 |
| ALO D2    | 2.105   | 2.634     | 3.1   |
| ALO D3    | 2.064   | 2.183     | 2.915 |
| ALO D4    | 2.76    | 2.013     | 2.201 |
| ALO D1-D4 | 3.838   | 4.902     | 4.553 |

---

**Supplementary Table 2. Hydrodynamic Parameters**

|                            | From QELS & TDA | From PDB       |
|----------------------------|-----------------|----------------|
| Ro (nm)                    | 2.5             | 2.5            |
| RH (nm)                    | $2.9 \pm 0.1$   | $3.5 \pm 0.1$  |
| Frictional ratio (f/fo)    | $1.16 \pm 0.04$ | $1.4 \pm 0.1$  |
| Molecular mass (kg/mol)    | $53.6 \pm 0.4$  | 54.0           |
| Intrinsic viscosity (ml/g) | $5.1 \pm 0.2$   | $5.5 \pm 0.2$  |
| Hydration (g/g)            | $0.4 \pm 0.1$   | $0.2 \pm 0.03$ |
| Viscosity increment        | $4.5 \pm 0.6$   | $6 \pm 0.4$    |
| a/b                        | $3.8 \pm 0.4$   | $5.2 \pm 0.3$  |
| a (nm)                     | $7.1 \pm 0.4$   | $9 \pm 0.9$    |
| b (nm)                     | $1.9 \pm 0.05$  | $1.7 \pm 0.2$  |

**Supplementary Table 3. Sedimentation Velocity statistics**

|                        | H6-ALO                             | H6-ALO                    | H6-ALO                   |
|------------------------|------------------------------------|---------------------------|--------------------------|
| <b>Data Collection</b> |                                    |                           |                          |
| Instrument             | Beckman Optima XLA                 | Beckman Optima XLA        | Beckman Optima XLA       |
| Buffer                 | 20 mM Sodium Citrate + 100 mM NaCl | 20 mM HEPES + 100 mM NaCl | 20 mM Tris + 100 mM NaCl |
| pH                     | 5.5                                | 7.0                       | 8.0                      |
| Points collected       | 300                                | 220                       | 220                      |
| <b>Refinement</b>      |                                    |                           |                          |
| Points refined         | 100                                | 100                       | 100                      |
| Resolution             | 200                                | 100                       | 100                      |
| Meniscus (cm)          | 6.1043                             | 6.0190                    | 5.9415                   |
| Bottom (cm)            | 7.2275                             | 7.2419                    | 7.2253                   |
| Friction ratio         | 1.568001                           | 1.395                     | 1.365                    |
| Rmsd                   | 0.009248                           | 0.013181                  | 0.013379                 |
| <b>c(M) analysis</b>   |                                    |                           |                          |
| Monomer                | 0.907440 (91.67%)                  | 0.772204 (97.505%)        | 0.834108 (97.78%)        |
| Avg MW (Dal)           | 53413                              | 53872                     | 53847                    |
| Dimer                  | .051029 (5.127%)                   | ---                       | ---                      |
| Avg MW (Dal)           | 107201                             | ---                       | ---                      |
| Trimer                 | .016593 (1.6675)                   | ---                       | ---                      |
| Avg MW (Dal)           | 157720                             | ---                       | ---                      |

## Supplemental Figure 1

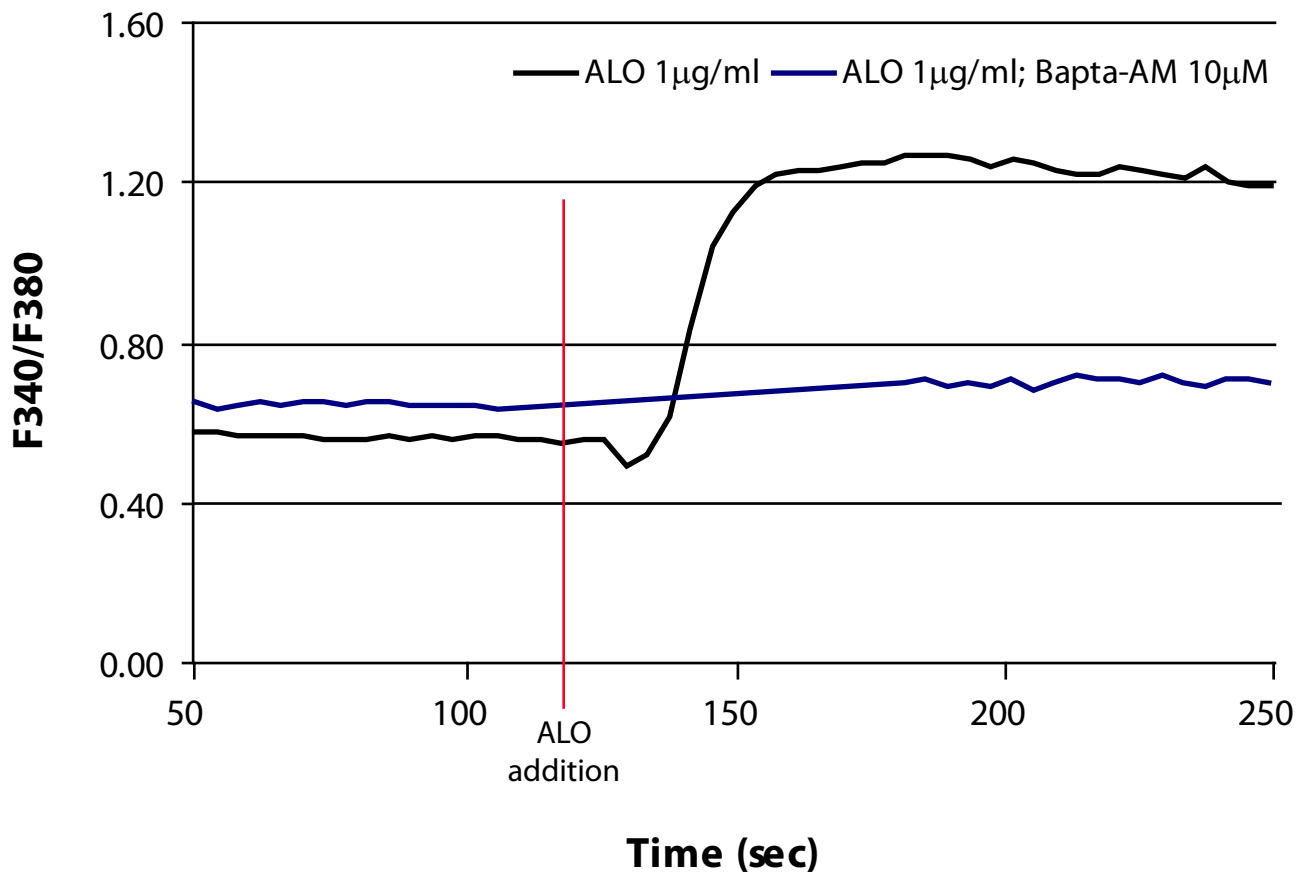

BAPTA-AM treatment of C2BBE monolayers reduces ALO-induced calcium flux. C2BBE monolayers were treated with the calcium chelator BAPTA-AM (10 μM) for 45 min prior to calcium flux imaging as detailed in the materials and methods. The Fura2 fluorometric ratio of 340 nm/380 nm was recorded over time to quantify the amount of intracellular calcium both prior to (left of red line) and after (right of red line) ALO treatment (1 μg/ml) of C2BBE monolayers. Control C2BBE monolayer treatment with ALO induced a calcium flux within seconds after treatment (black line). Calcium flux within BAPTA-AM treated C2BBE monolayers was not seen after ALO treatment (blue line). This figure is the average of 20-25 individual cells.

## Supplemental Figure 2

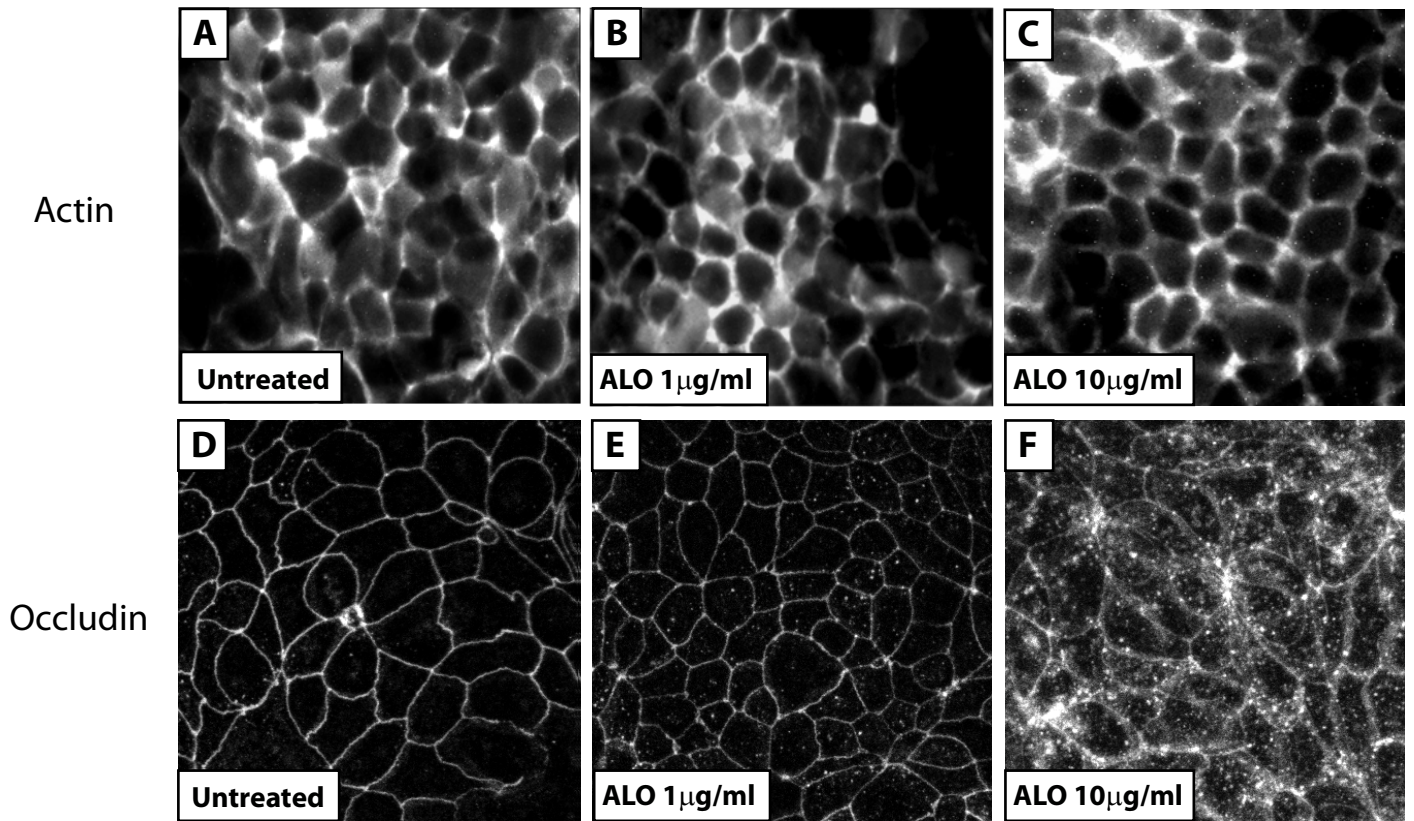

Supplemental Figure 2 - Cytoskeletal localization of actin does not change during ALO treatment. C2BBE monolayers are either left untreated (A,D), treated with ALO at 1 μg/ml (B,E) or ALO at 10 μg/ml (C,F) for 2hrs. Monolayers labeled with Alexa Fluor 680 phalloidin (A-C), which labels polymerized actin, shows little ALO dependent rearrangement. For comparison, the same C2BBE monolayers labeled with anti-occludin antibodies from Fig. 2 are included. In addition, C2BBE monolayers treated with ALO (1 μg/ml) shows an intermediate phenotype, as occludin is mostly located at the cell periphery but intracellular punctate staining is detectable.
